# Supplementary material for: Optimal Medical Therapy with or without PCI for Stable Coronary Disease
Source: Atypon-hosted journal article supplement (doi:10.1056/nejmoa070829), 2007-03-26
Supplement: nejmoa070829sa1.pdf [file nejmoa070829sa1.pdf]

## Supplementary Appendix

This appendix has been provided by the authors to give readers additional information about their work.

Supplement to: Boden WE, O'Rourke RA, Teo KK, et al. Optimal medical therapy with or without PCI for stable coronary disease. *N Engl J Med* 2007;356. DOI: 10.1056/NEJMoa070829.

## **Electronic Supplementary Appendix**

### **Inclusion Criteria (all 4 criteria must be met)**

Patients with a  $\geq 70\%$  lesion in  $\geq 1$  vessel subtending a large area of myocardium with one of the following:

- Prior PCI or CABG with evidence of ischemia
- Chronic stable angina, CCS class I-III
- Post-MI patients without class IV angina, severe LV dysfunction, or arrhythmia
- Asymptomatic ischemia detected by exercise or perfusion scintigraphy or 24-hour ambulatory ECG recording

Patients who meet criteria adapted from one of the existing AHA/ACC Joint Task force Class I or II indications for PCI:

- Patients with single-vessel CAD who are asymptomatic to severely symptomatic and who have a large area of ischemic myocardium subtending a significant ( $>50\%$  diameter reduction) coronary stenosis (AHA/ACC Class I indication) or a moderate area of ischemia (AHA/ACC Class II indication).
- Patients with multivessel CAD who are asymptomatic to severely symptomatic. Asymptomatic or minimally symptomatic patients must have a large ischemic area or moderate ischemic area (AHA/ACC Class II indication) to qualify.

Has at least 1 vessel for angioplasty meeting one of the following criteria:

- Right coronary artery: proximal to the posterior descending artery in a right dominant vessel
- Left circumflex coronary artery: proximal to 1 or 2 OM branches or proximal to the posterior descending artery and posterolateral branches in a left dominant vessel
- LAD: proximal or mid vessel
- SVG or LIMA: graft must supply the same regions as outlined previously or, in the opinion of the interventionalist, the coronary stenosis subtends a major mass of myocardium

Has objective evidence of myocardial ischemia or severe symptoms with marked coronary stenosis including one of the following:

- Spontaneous new ST-T changes on resting ECG defined as either  $\geq 1.0$  mm ST-segment deviation from the baseline (80 mm from J point) or  $>2.0$  mm T-wave inversion (or pseudonormalization, if T waves were previously inverted) in a minimum of 2 contiguous leads within 1 of 3 ECG lead groups (anterior V1-V4; inferior II, III, aVF; lateral I, aVL, V5-V6)
- Objective evidence of stress-induced myocardial ischemia as detected by standard 12-lead exercise stress test, exercise or pharmacologic stress (adenosine or dipyridamole) coupled with perfusion scintigraphy, exercise or pharmacologic stress (dobutamine) coupled with 2-dimensional echocardiography, or exercise radionuclide ventriculography, based on one of the following:
  - $>1.0$  mm ST-segment deviation from baseline on standard treadmill exercise using 12-lead ECG
  - $\geq 1$  Scintigraphic perfusion defects during exercise technetium 99m sestamibi or thallium-based isotope imaging
  - $\geq 1$  Perfusion defects (reversible or partial reversible) with pharmacologic stress (dipyridamole, adenosine) during technetium 99m sestamibi or thallium imaging
  - $\geq 1$  Wall motion abnormalities during exercise radionuclide ventriculography
  - 2-Dimensional echocardiography (exercise or dobutamine)
  - Severe angina (CCS class III) and coronary stenosis  $\geq 80\%$

---

PCI, percutaneous coronary intervention; CABG, coronary artery bypass grafting; CCS, Canadian Cardiovascular Society; MI, myocardial infarction; ECG, electrocardiogram; AHA, American Heart Association; ACC, American College of Cardiology; CAD, coronary artery disease; OM, obtuse marginal branch; LAD, left anterior descending coronary artery; SVG, saphenous vein graft; LIMA, left internal mammary artery.

### **Exclusion Criteria**

- Unstable angina and symptoms refractory to maximal oral and intravenous medical therapy (persistent CCS class IV)
- Post-MI course complicated by persistent rest angina, shock, and persistent CHF for which the need or likelihood of urgent myocardial revascularization is high
- Coronary angiographic exclusions:

- Patients with no prior CABG and left main coronary disease  $\geq 50\%$
- Coronary arteries technically unsuitable or hazardous for PCI
- Patients with nonsignificant CAD in whom PCI would not be considered appropriate or indicated
- Patients with restenosis of a lesion previously treated with PCI and no other target lesion
- EF  $< 30\%$  ( $< 35\%$  if patient has 3-vessel disease including  $> 70\%$  LAD proximal stenosis)
- Cardiogenic shock
- Pulmonary edema or heart failure unresponsive to standard medical therapy
- CABG or PCI within the last 6 months
- Concomitant valvular heart disease likely to require surgery or affect prognosis during follow-up
- Congenital or primary cardiac muscle disease likely to affect prognosis during follow-up
- Resuscitated out-of-hospital sudden death or symptomatic sustained or nonsustained ventricular tachycardia
- Significant systemic hypertension (BP  $> 200/100$  mm Hg) unresponsive to medical therapy
- Markedly positive stress test (significant ST segment depressions or hypotensive response during stage I of the Bruce protocol)
- Severe noncardiovascular comorbidity limiting survival

---

CCS, Canadian Cardiovascular Society; MI, myocardial infarction; CHF, congestive heart failure; CABG, coronary artery bypass grafting; PCI, percutaneous coronary intervention; EF, ejection fraction; LAD, left anterior descending coronary artery; BP, blood pressure.

### Sample Size Calculation Assumptions

We projected a 3-year composite event rate of 21% in the medical therapy only arm and 16.4% in the PCI plus medical therapy arm (relative difference of 22%, absolute difference of 4.6%). Sample size estimates are predicated on the following assumptions:

- a trial duration of 7 years;
- patient accrual for 54 months, 2/3 rate for first year, full rate thereafter;
- minimum follow-up duration of 30 months (average follow-up duration of 55 months);
- cross-over rate from PCI to medical therapy of 1% during the first 6 months, none thereafter;
- cross-over rate from medical therapy to PCI of 3% for the first 2 years, 2% for the next 2 years, and 1% thereafter;
- two-sided tests of significance at an  $\alpha = 0.05$ ;
- annual loss to follow up rate of 1%;

The program published by Joanna Shih in CCT (1995) 16:395-407 was used for the calculations. Accordingly, a sample size of 1,984 patients would have 80% power and 2,270 patients would have 85% power. The latter corresponds to 602 endpoints or 614 after an adjustment of 2% for sequential monitoring. Using the above assumptions the sample size achieved by the study group has 85% power to detect a 22% relative difference and 80% power to detect a 20.9% relative difference.

## Supplementary Appendix

Clinical study sites: by sector, site name, co-investigator(s) and/or coordinator(s) and other supporting personnel: **VA:** *South Texas Veterans HCS, TX:* G.L. Freeman, R. Chilton, P. Norton, V. Goswami, P. Freeman, R. Mercado-Young; *Houston VA Medical Center:* C. LeBlanc, T. Frary; *Durham VA Medical Center:* M. Krucoff, K. Swails; *VA New York Harbor HCS, NY:* L. Stein, Rosemarie Gambetta; *VA Ann Arbor HCS, MI:* M. Starling, K. Syzmanski, A. Bargardi, D. Adams, D. Bondie; *Lexington VA Medical Center, KY:* C. Chasen, P. Moreno; *James A. Haley Veterans Hospital, FL:* G. Barbier, V. Curkovic, R. Ahuja, M. Siddique, G. Cintron, C. Dodd, K. Bell, R. Maldonado; *VA Puget Sound HCS, WA:* M. Stadius, J. Dinkelspiel, J. LaGuire, J. Gieselman, E. Herzog, M. Khan, A. Prentiss, C. Wallace, A. Shen, P. Hanrahan, M. Platt; *New Mexico VA HCS, NM:* M. Crawford, K. Allen, G. Charlton; *Portland VA Medical Center, OR:* D. Sengenberger, G. Larsen, J. Case, T. Krall; *Iowa City VA Medical Center, IA:* D. Jagasia, A. Ollinger, M. Costigan, K. Braddy; *Central Arkansas Veterans HCS, AR:* J. Saucedo, J. Talley, E. Smith, B. Singh, J. Jacob, J. Bissett, Y. Aude, R. Pacheco, S. Dodson, S. Kitchens, F. Katkhordeh, C. Valentine, I. West; *Atlanta VA Medical Center, GA:* M. Leimbach, House, A. Lane; *Tennessee Valley HCS, TN :* D. Hansen, R. McAdam, M. Agirbasli, I. Singh, P. Holzapfel, M.J. Brewer, T. Holtman; *Memphis VA Medical Center, TN:* Z. Qualls.

**CANADA:** *London Health Sciences Centre, ON:* D. Almond, P. Teefy, C. Bone, J. White; *Sudbury Regional Hospital, ON:* R. Labonte, G. Syan, S. Mecci, D. Gignac S. Musseau, R-A. Poirier, T. Sequin; *Montreal Heart Institute, QU:* J. Crepeau, R. Gallo, J. Gregoire, JC Gregoire, M. Juneau, I. Dyrda, M. Cuso, M. Brouillette, M. Brousseau, P. Thibeault; *Queen Elizabeth II HSC, NS:* B. O'Neill, C. Kells, H. Beydoun, N. Fitzgerald, P. Simon, C. Carter; *Sunnybrook HSC, ON:* B. Wong, J. Nikhil, J. Pang, S. Naqui, S. Radhakrishnan, J. Cohen, A. Taylor, D. Ko, A. Dick, M. Madan, J. Dubbin, R. Vijayaragharan, L. Balleza; *University Health Network-The Toronto Hospital, ON:* P. Barolet, P. McLaughlin, C. Lazzam, L. Schwartz, J. Ross, A. Patel; *Hamilton General Hospital/McMaster Clinic, ON:* A. Montgomery S. Savoy, C. Miller, C. Tartaglia; *St. Michael's Hospital, ON:* W. Batchelor, M. Freeman, K. Young, A. Fry, D.O'Donnell, L. Parsons, S. Launder, T. Patel; *Vancouver Hospital & HSC, BC:* C. Buller, I. Penn, D. Ricci, J. Hamburger, S. MacLeod, J. Saw, A. Starovoytov, N.Uchida, N. Meadows, G. Keulen, R. Fox; *Saint John's Regional Hospital, NB:* R. Teskey, S. Lutchmedial, V. Paddock, L. O'Brien, C. Dube, J. Lane, C. Coyle, A. Williston, C. Ramsay, E. Collings, J. Drake, B. Marshall, D. Strong, E. Smith; *St. Paul's Hospital, BC:* C. Thompson, T. Williams, J. Conde, M. Wilson, S. Tomlinson, S. O'Donoghue; *University of Alberta Hospital, AB:* KK. Teo, V. Dzavik, J. Burton, W. Taylor, R. Welsh, J. Choy, L. Lalonde, T. Muzyka, M. Graham.

**US Non-VA:** *Mayo Clinic Rochester, MN:* G. Gau, P. Berger, T. Holmes, R. Gibbons, B. Gersh, K. Kloos, G. Truex, T. Valley, R. Wiegand, G. James, K. Hodgman, T. Malibago, C. Haugen, K. Beck, P. Blommer, T. Miller; *MIMA Century Research Associates, FL:* T. Swain, N. Schechtmann, S. Karas, R. Nadolny, J. Ronaldson, N. Scallon, L. Parker, M. Howard; A. Snyman; *University of Michigan Medical Center, MI:* E. Bates, S. Chetcuti,

K. McNeely; *Southern California Kaiser Permanente Medical Group, CA*: R. Browning, P. Scutella; *University of Oklahoma HSC, OK*: S. Sadanandan; A. Kugelmass, L. Feddersen, K. Husain, V. VanHooser, J. Wells; *Mid America Heart Institute, MO*: B. McAllister, M. Rossen, A. Jacobs; *Boston Medical Center, MA*: D. Fine, C. Zingariello, J. Hutchinson, D. Gannon; *Emory University Hospital, GA*: S. Manoukian, W. Weintraub, Z. Ghazzal, P. Block, D. Morris, L. Sperling, C. Lewis, P. Hyde, E. Block; *University of Maryland Medical Systems, Baltimore, MD*: M. Miller, J. Ference, E. Schilling; *University of Rochester Medical Center, NY*: F. Ling, D. Bedard, K. Kremer, C. Marrocco; *Vanderbilt University Hospital, TN*: D. Hansen, R. McAdams, P. Holzapfel, M.J. Brewer; *SUNY Medical University Hospital, NY*: J. Morrison, L. Kozlowski, A. Clancy, M. Jones, M. Castle; *Cleveland Clinic, OH*: A. Knesebeck, K. Comella; *Barnes-Jewish Hospital, MO*: K. Luepke, C. Wittenberg, L. Appel, G. Gardner, A. Conboy, S. Aubuchon; *Mayo Clinic Scottsdale, AZ*: M. Crawford, F. Fortuin, S. Lester, L. Wood, R. Rush, J. Tiede, R. McLaughlin; *Christiana Care Health Systems, DE*: J. Strong, A. Dougherty; *Rush-Presbyterian-St. Luke's Medical Center, Chicago, IL*: S. Feinstein.
